# Supplementary material for: Tumor Necrosis Factor (TNF) blocking agents are associated with lower risk for Alzheimer’s disease in patients with rheumatoid arthritis and psoriasis
Source: PLoS One. 2020 Mar 23;15(3):e0229819. doi: 10.1371/journal.pone.0229819 (PMC7089534; doi:10.1371/journal.pone.0229819)
Supplement: S4 Table — (XLSX) [file pone.0229819.s010.xlsx]

## Sheet: Etanercept_dementia
Group	Dementia_drug	Other_drug	Dementia_control	Other_control
Female_Adult_White	40	3810	260	18170
Female_Senior_White	170	2420	2980	24800
Female_Senior_Nonwhite	30	420	560	5040
Male_Adult_White	20	1150	80	5110
Male_Senior_White	50	1010	1090	10240

## Sheet: Etanercept_AD
Group	AD_drug	Other_drug	AD_control	Other_control
Female_Senior_White	50	2540	1040	26740
Female_Senior_Nonwhite	10	440	200	5400
Male_Senior_White	20	1050	370	10970

## Sheet: Adalimumab_dementia
Group	Dementia_drug	Other_drug	Dementia_control	Other_control
Female_Adult_White	50	4100	260	18170
Female_Adult_Nonwhite	10	920	60	5550
Female_Senior_White	150	2090	2980	24800
Female_Senior_Nonwhite	40	380	560	5040
Male_Adult_White	10	1280	80	5110
Male_Senior_White	50	870	1090	10240

## Sheet: Adalimumab_AD
Group	AD_drug	Other_drug	AD_control	Other_control
Female_Senior_White	50	2190	1040	26740
Female_Senior_Nonwhite	10	410	200	5400
Male_Senior_White	20	900	370	10970

## Sheet: Infliximab_dementia
Group	Dementia_drug	Other_drug	Dementia_control	Other_control
Female_Adult_White	20	1320	260	18170
Female_Senior_White	230	2460	2980	24800
Female_Senior_Nonwhite	30	310	560	5040
Male_Senior_White	70	840	1090	10240

## Sheet: Infliximab_AD
Group	AD_drug	Other_drug	AD_control	Other_control
Female_Senior_White	70	2620	1040	26740
Female_Senior_Nonwhite	10	320	200	5400
Male_Senior_White	30	880	370	10970

## Sheet: drug group size for dementia
drug group	group count
Etanercept	10300
Adalimumab	10280
Infliximab	6080
No TNF	76890

## Sheet: drug group size for AD
drug group	group count
Etanercept	4230
Adalimumab	3670
Infliximab	4010
No TNF	46170
