# Supplementary material for: Tumor Necrosis Factor (TNF) blocking agents are associated with lower risk for Alzheimer’s disease in patients with rheumatoid arthritis and psoriasis
Source: PLoS One. 2020 Mar 23;15(3):e0229819. doi: 10.1371/journal.pone.0229819 (PMC7089534; doi:10.1371/journal.pone.0229819)
Supplement: S5 Table — The analysis excluded patients with a prescription history of a TNF blocker and methotrexate. (XLSX) [file pone.0229819.s011.xlsx]

## Sheet: Etanercept_dementia
Group	Dementia_drug	Other_drug	Dementia_control	Other_control
Female_Adult_White	30	1650	760	69430
Female_Senior_White	50	640	3650	38380
Male_Adult_White	20	1940	680	59800
Male_Senior_White	40	720	2940	38200

## Sheet: Etanercept_AD
Group	AD_drug	Other_drug	AD_control	Other_control
Female_Senior_White	10	670	1370	40660
Male_Senior_White	10	750	1070	40070

## Sheet: Adalimumab_dementia
Group	Dementia_drug	Other_drug	Dementia_control	Other_control
Female_Adult_White	30	2730	760	69430
Female_Senior_White	40	690	3650	38380
Male_Adult_White	20	3040	680	59800
Male_Senior_White	10	730	2940	38200

## Sheet: Adalimumab_AD
Group	AD_drug	Other_drug	AD_control	Other_control
Female_Senior_White	10	720	1370	40660

## Sheet: Infliximab_dementia
Group	Dementia_drug	Other_drug	Dementia_control	Other_control
Female_Senior_White	20	260	3650	38380
Male_Senior_White	10	220	2940	38200

## Sheet: Infliximab_AD
Group	AD_drug	Other_drug	AD_control	Other_control
Female_Senior_White	10	260	1370	40660

## Sheet: Methotrexate_dementia
Group	Dementia_drug	Other_drug	Dementia_control	Other_control
Female_Adult_White	40	5200	760	69430
Female_Senior_White	350	4010	3650	38380
Female_Senior_Nonwhite	30	410	430	4660
Male_Adult_White	40	3200	680	59800
Male_Senior_White	230	2730	2940	38200
Male_Senior_Nonwhite	10	280	310	5310

## Sheet: Methotrexate_AD
Group	AD_drug	Other_drug	AD_control	Other_control
Female_Senior_White	110	4250	1370	40660
Male_Senior_White	80	2870	1070	40070

## Sheet: drug group size for dementia
drug group	group count
Etanercept	5730
Adalimumab	8320
Infliximab	1640
Methotrexate	17990
No drug	259720

## Sheet: drug group size for AD
drug group	group count
Etanercept	1580
Adalimumab	1640
Infliximab	570
Methotrexate	8040
No drug	94040
