# Supplementary material for: Tumor Necrosis Factor (TNF) blocking agents are associated with lower risk for Alzheimer’s disease in patients with rheumatoid arthritis and psoriasis
Source: PLoS One. 2020 Mar 23;15(3):e0229819. doi: 10.1371/journal.pone.0229819 (PMC7089534; doi:10.1371/journal.pone.0229819)
Supplement: S12 Table — (XLSX) [file pone.0229819.s018.xlsx]

## Sheet: Etanercept_RA_dementia_smoker
Group	Dementia_drug	Other_drug	Dementia_control	Other_control
Female_Adult_White_nonsmoker	10	1830	2300	42080
Female_Senior_White_nonsmoker	80	1200	10990	54930
Female_Senior_Nonwhite_nonsmoker	20	190	2090	10670
Male_Senior_White_nonsmoker	20	560	3660	19840

## Sheet: Adalimumab_RA_dementia_smoker
Group	Dementia_drug	Other_drug	Dementia_control	Other_control
Female_Adult_White_nonsmoker	20	1420	2300	42080
Female_Senior_White_nonsmoker	60	900	10990	54930
Female_Senior_Nonwhite_nonsmoker	20	140	2090	10670
Male_Senior_White_nonsmoker	20	350	3660	19840

## Sheet: Infliximab_RA_dementia_smoker
Group	Dementia_drug	Other_drug	Dementia_control	Other_control
Female_Senior_White_nonsmoker	70	700	10990	54930
Female_Senior_Nonwhite_nonsmoker	10	110	2090	10670
Male_Senior_White_nonsmoker	20	260	3660	19840

## Sheet: Methotrexate_RA_dementia_smoker
Group	Dementia_drug	Other_drug	Dementia_control	Other_control
Female_Adult_White_nonsmoker	150	11710	2300	42080
Female_Adult_Nonwhite_nonsmoker	40	3750	1060	13060
Female_Senior_White_nonsmoker	2130	17730	10990	54930
Female_Senior_Nonwhite_nonsmoker	390	3560	2090	10670
Male_Adult_White_nonsmoker	30	2810	680	10550
Male_Senior_White_nonsmoker	710	6660	3660	19840
Male_Senior_Nonwhite_nonsmoker	70	880	600	2950
